# Supplementary material for: Enhanced drug internalization and therapeutic efficacy of PEGylated nanoparticles by one-step formulation with anti-mPEG bispecific antibody in intrinsic drug-resistant breast cancer
Source: Royal Society of Chemistry journal article supplement (doi:10.1039/c9bm00323a), 2019-01-01
Supplement: c9bm00323a1.pdf [file c9bm00323a1.pdf]

**Title:**

**Enhanced Drug Internalization and Therapeutic Efficacy of PEGylated Nanoparticles by One-step Formulation with Anti-mPEG Bispecific Antibody in Intrinsic Drug Resistant Breast Cancer**

Yi-An Cheng<sup>#</sup>, I-Ju Chen<sup>#</sup>, Yu-Cheng Su, Kai-Wen Cheng, Yun-Chi Lu, Wen-Wei Lin, Yuan-Chin Hsieh, Chien-Han Kao, Fang-Ming Chen, Steve R. Roffler<sup>\*</sup>, Tian-Lu Cheng<sup>\*</sup>

**Supplementary Information**

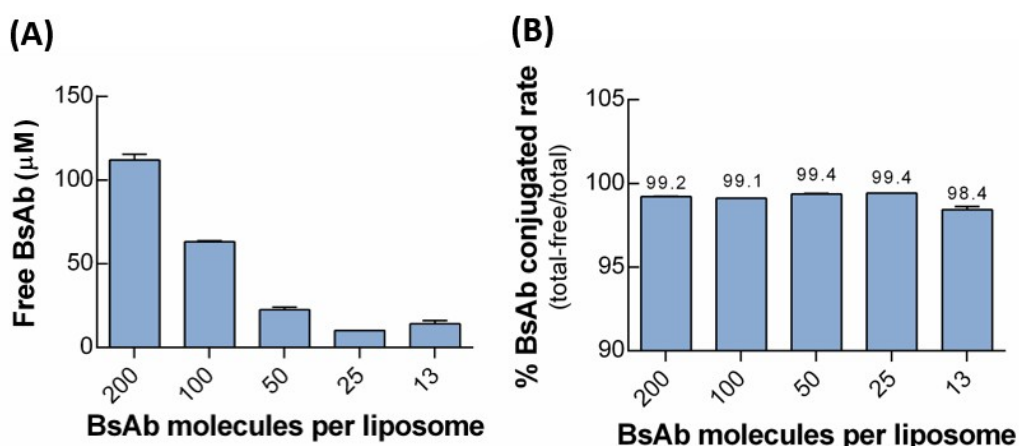

**Figure S1. The conjugated rate of the  $\alpha$ HER2/PLD.** (A) The different amount of BsAb mixed with  $\alpha$ HER2/PLD. After 5 min incubation, the  $\alpha$ HER2/PLDs were added in mPEG/BSA-coated 96-well plate, and then the free BsAb (unbound) was detected by ELISA using HRP-conjugated anti-human Fab antibody. (B) The conjugated rate of  $\alpha$ HER2/PLD were calculated by total number of BsAb minus number of free BsAb then divide by number of total BsAb. Results show the mean absorbance values (n=3). Bar, SD.

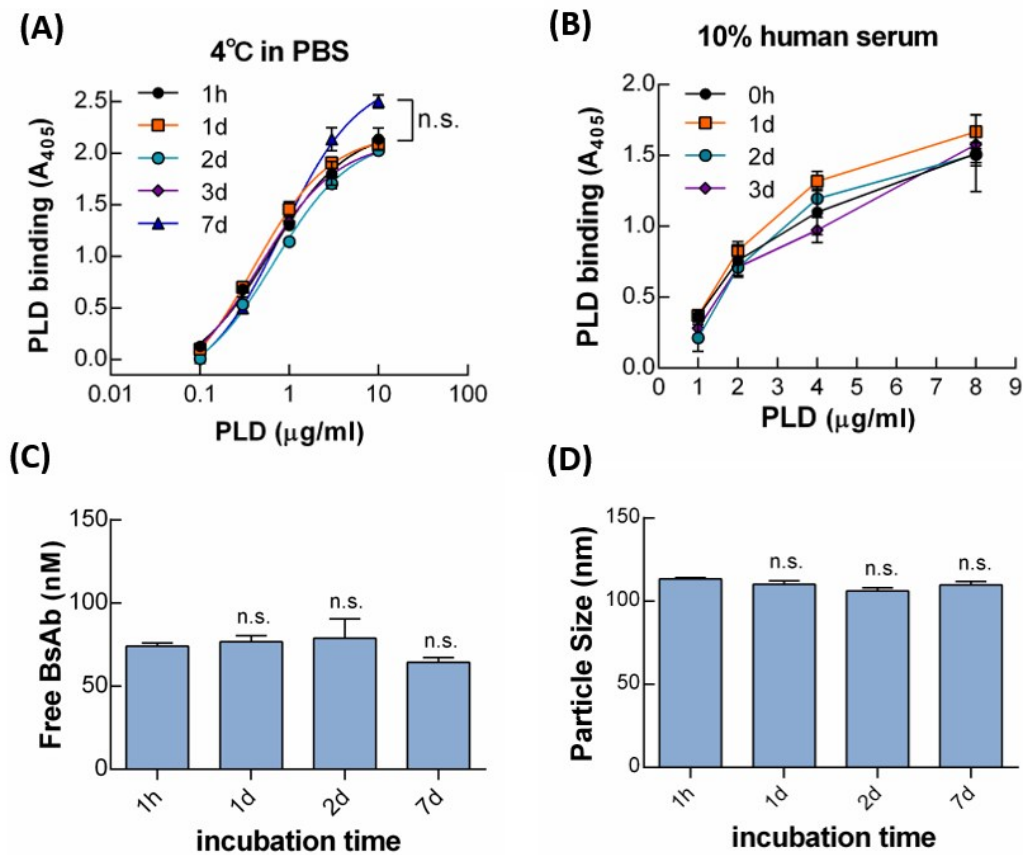

**Figure S2. Stability of the  $\alpha\text{HER2/PLD}$ .** **(A)** The storage stability of  $\alpha\text{HER2/PLD}$  at 4°C was examined by detecting the particle size. (n=3). Bars, SD. Statistics indicate student unpaired t test. **(B)** The  $\alpha\text{HER2/PLD}$  was incubated at 37°C in 10% human serum/PBS (vol/vol) for 3 days and then was detected HER2 binding ability. Results show the mean absorbance values (n=3). Statistics indicate student unpaired t test. **(C)** The free BsAb and **(D)** the particle size of  $\alpha\text{HER2/PLD}$  at 4°C in PBS for 7d incubation was evaluated (n=3).

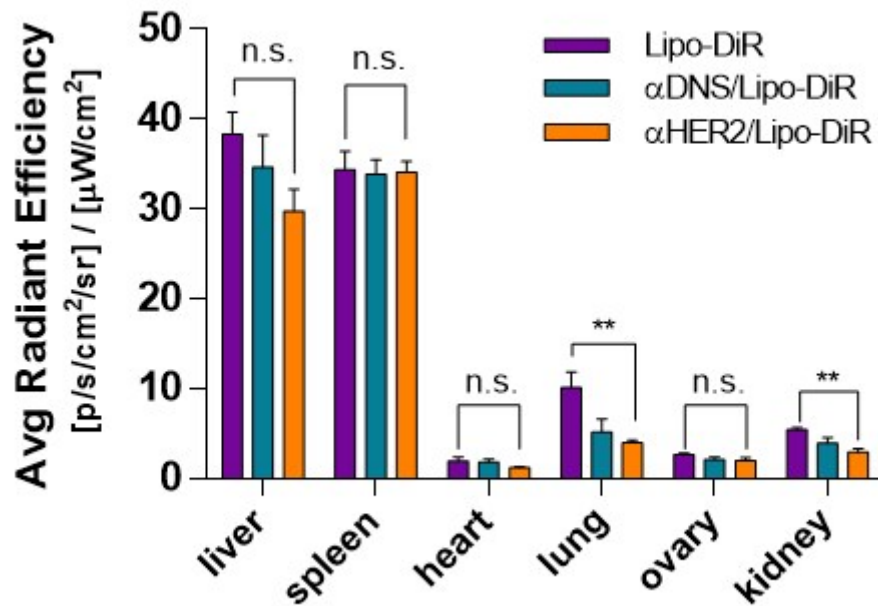

**Figure S3. The off-target of the αHER2/PLD in mice.**

Nude mice (n=3) were intravenously injected with Lipo-DiR, αDNS/Lipo-DiR and αHER2/Lipo-DiR, respectively. After 72h, the mice were sacrificed and detected the fluorescence intensity of organs (liver, spleen, heart, lung, ovary and kidney). Results show the average radiant efficiency. Statistics indicate student unpaired t test. \*\* $P < 0.001$ . n.s., not significant.

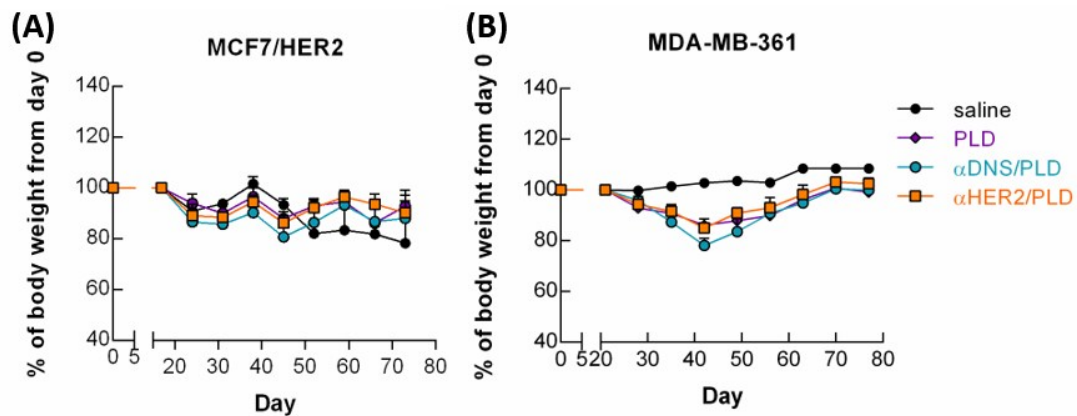

**Figure S4. The body weight of αHER2/PLD.** (A) Nude mice bearing MCF7/HER2 tumors and (B) SCID mice bearing MDA-MB-361 tumors were intravenously injected with saline (●), 5 mg/kg PLD (◆), 5 mg/kg αDNS/PLD (●), or 5 mg/kg αHER2/PLD (■), respectively. Mean body weights of treated mice during treatment are shown.

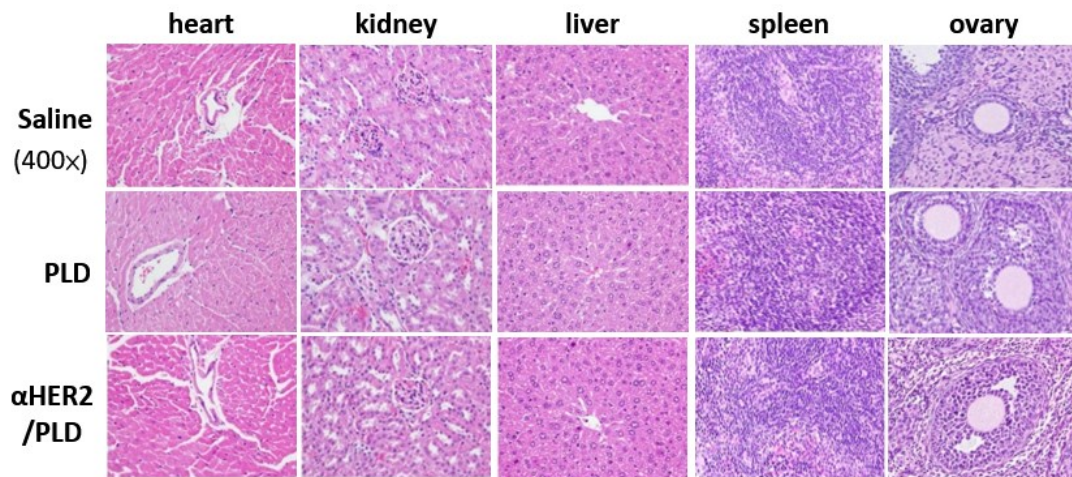

**Figure S5. The histopathological of  $\alpha$ HER2/PLD.**

Female BALB/c mice (n=6) were intravenously injected with saline, 5 mg/kg PLD or 5 mg/kg  $\alpha$ HER2/PLD, respectively. Treatment was performed once a week for 3 weeks. The mice were sacrificed and the tissue section were stained H&E. 400x.
